# Supplementary material for: HpaB-Dependent Secretion of Type III Effectors in the Plant Pathogens Ralstonia solanacearum and Xanthomonas campestris pv. vesicatoria
Source: PubMed Central journal article supplement (PMC5501821; doi:10.1038/s41598-017-04853-9), 2017-07-07
Supplement: 41598_2017_4853_MOESM1_ESM.pdf [file 41598_2017_4853_MOESM1_ESM.pdf]

## Supplementary informations

HpaB-Dependent Secretion of Type III Effectors in the Plant Pathogens *Ralstonia solanacearum* and *Xanthomonas campestris* pv. *vesicatoria*

Fabien Lonjon<sup>1</sup>, David Lohou<sup>1</sup>, Anne-Claire Cazalé<sup>1</sup>, Daniela Büttner<sup>2</sup>, Barbara Gomes Ribeiro<sup>1</sup>, Claire Péanne<sup>1</sup>, Stéphane Genin<sup>1</sup>, Fabienne Vaillieu<sup>1,\*</sup>

<sup>1</sup>LIPM, Université de Toulouse, INRA, CNRS, INPT, Castanet-Tolosan, France

<sup>2</sup>Institute of Biology, Genetics Department, Martin Luther University Halle-Wittenberg, D-23 06099 Halle (Saale), Germany

\*fabienne.vaillieu@inra.fr

**Supplementary Table S1: Results of the interactions between *Ralstonia solanacearum* type III effectors and HpaB and HpaD proteins after yeast two-hybrid assays.**

| <i>R. solanacearum</i><br>type III effector | <i>R. solanacearum</i><br>corresponding gene | Interaction with<br>HpaB in yeast | Interaction with<br>HpaD in yeast |
|---------------------------------------------|----------------------------------------------|-----------------------------------|-----------------------------------|
| RipA1                                       | <i>RSc2139</i>                               | -                                 | -                                 |
| RipA2                                       | <i>RSp0099</i>                               | -                                 | -                                 |
| RipA3                                       | <i>RSp0846</i>                               | -                                 | -                                 |
| RipA4                                       | <i>RSp0847</i>                               | -                                 | -                                 |
| RipA5                                       | <i>RSp1024</i>                               | -                                 | -                                 |
| RipB                                        | <i>RSc0245</i>                               | -                                 | -                                 |
| RipG1                                       | <i>RSp0914</i>                               | +                                 | -                                 |
| RipG3                                       | <i>RSp0028</i>                               | -                                 | -                                 |
| RipG4                                       | <i>RSc1800</i>                               | +                                 | +                                 |
| RipG5                                       | <i>RSc1801</i>                               | +                                 | -                                 |
| RipG6                                       | <i>RSc1356</i>                               | -                                 | -                                 |
| RipG7                                       | <i>RSc1357</i>                               | -                                 | -                                 |
| RipH1                                       | <i>RSc1386</i>                               | -                                 | -                                 |
| RipH2                                       | <i>RSp0215</i>                               | -                                 | -                                 |
| RipH3                                       | <i>RSp0160</i>                               | -                                 | -                                 |
| RipI                                        | <i>RSc0041</i>                               | -                                 | -                                 |
| RipO1                                       | <i>RSp0323</i>                               | +                                 | +                                 |
| RipP1                                       | <i>RSc0826</i>                               | +                                 | +                                 |
| RipP2                                       | <i>RSc0868</i>                               | Autoactivation                    | Autoactivation                    |
| RipQ                                        | <i>RSp1277</i>                               | -                                 | -                                 |
| RipR                                        | <i>RSp1281</i>                               | -                                 | -                                 |
| RipU                                        | <i>RSp1212</i>                               | -                                 | -                                 |
| RipV1                                       | <i>RSc1349</i>                               | -                                 | -                                 |
| RipW                                        | <i>RSc2775</i>                               | -                                 | -                                 |
| RipZ                                        | <i>RSp1031</i>                               | -                                 | -                                 |
| RipAD                                       | <i>RSp1601</i>                               | -                                 | -                                 |
| RipAF1                                      | <i>RSp0822</i>                               | +                                 | +                                 |
| RipAG                                       | <i>RSc0824</i>                               | -                                 | -                                 |
| RipAJ                                       | <i>RSc2101</i>                               | -                                 | -                                 |
| RipAK                                       | <i>RSc2359</i>                               | +                                 | -                                 |
| RipAM                                       | <i>RSc3272</i>                               | -                                 | -                                 |
| RipAN                                       | <i>RSp0845</i>                               | -                                 | -                                 |
| RipAV                                       | <i>RSp0732</i>                               | -                                 | +                                 |
| RipAW                                       | <i>RSp1475</i>                               | +                                 | +                                 |
| RipAY                                       | <i>RSp1022</i>                               | -                                 | -                                 |
| RipAZ1                                      | <i>RSp1582</i>                               | -                                 | -                                 |
| RipTAL                                      | <i>RSc1815</i>                               | -                                 | +                                 |
| RipTPS                                      | <i>RSp0731</i>                               | +                                 | +                                 |

**Supplementary Table S2: Strains and plasmids used in this study.**

|                                                            | Characteristics                                                                                                               | Source                             |
|------------------------------------------------------------|-------------------------------------------------------------------------------------------------------------------------------|------------------------------------|
| <b><i>R. solanacearum</i> strains</b>                      |                                                                                                                               |                                    |
| GMI1000                                                    | Wild-type strain                                                                                                              | 1                                  |
| GMI1694                                                    | GMI1000 <i>hrcV</i> :: $\Omega$ mutant, Sp <sup>r</sup>                                                                       | 2                                  |
| GRS266                                                     | GMI1000 <i>hpaD</i> :: $\Omega$ mutant, Sp <sup>r</sup>                                                                       | 2                                  |
| GRS474                                                     | GMI1000 <i>hpaB</i> :: $\Omega$ mutant, Sp <sup>r</sup>                                                                       | 3                                  |
| <b><i>X. campestris</i> pv. <i>vesicatoria</i> strains</b> |                                                                                                                               |                                    |
| 85-10                                                      | wild type strain; Rif <sup>r</sup>                                                                                            | 4                                  |
| 85*                                                        | 85-10 derivative containing the <i>hrpG</i> * mutation, Rif <sup>r</sup>                                                      | 5                                  |
| 85* $\Delta$ <i>hpaB</i>                                   | <i>hpaB</i> deletion mutant (deleted in codons 13 to 149) of strain 85*, Rif <sup>r</sup>                                     | 6                                  |
| <b>Yeast strain</b>                                        |                                                                                                                               |                                    |
| AH109                                                      | Matchmaker <sup>TM</sup> yeast strain                                                                                         | BD Biosciences, Palo Alto, CA, USA |
| <b><i>E. coli</i> strain</b>                               |                                                                                                                               |                                    |
| BL21(DE3)                                                  | F <sup>-</sup> <i>ompT gal dcm lon hsdSB</i> (r <sub>B</sub> <sup>-</sup> m <sub>B</sub> <sup>-</sup> )                       | Invitrogen, Carlsbad, CA, USA      |
| Rosetta                                                    | F <sup>-</sup> <i>ompT hsdSB</i> (r <sub>B</sub> <sup>-</sup> m <sub>B</sub> <sup>-</sup> ) <i>gal dcm (DE3) pRARE (CamR)</i> | Invitrogen, Carlsbad, CA, USA      |
| <b>Plasmids used for cloning</b>                           |                                                                                                                               |                                    |
| pACC61                                                     | pDONR207 derivative carrying <i>ripAZ1</i> , Gm <sup>r</sup>                                                                  | This study                         |
| pACC73                                                     | pDONR207 derivative carrying <i>ripAF1</i> , Gm <sup>r</sup>                                                                  | This study                         |
| pACC75                                                     | pDONR207 derivative carrying <i>ripO1</i> , Gm <sup>r</sup>                                                                   | This study                         |
| pACC82                                                     | pDONR207 derivative carrying <i>ripZ</i> , Gm <sup>r</sup>                                                                    | This study                         |
| pACC93                                                     | pDONR207 derivative carrying <i>ripAM</i> , Gm <sup>r</sup>                                                                   | This study                         |
| pACC98                                                     | pDONR207 derivative carrying <i>ripH2</i> , Gm <sup>r</sup>                                                                   | This study                         |
| pACC113                                                    | pDONR207 derivative carrying <i>ripAK</i> , Gm <sup>r</sup>                                                                   | This study                         |
| pACC221                                                    | pDONR207 derivative carrying <i>ripAN</i> , Gm <sup>r</sup>                                                                   | This study                         |

|                 |                                                                                                                                                        |                                     |
|-----------------|--------------------------------------------------------------------------------------------------------------------------------------------------------|-------------------------------------|
| pACC271         | pDONR207 derivative carrying <i>ripAW</i> , Gm <sup>r</sup>                                                                                            | This study                          |
| pACC276         | pDONR207 derivative carrying <i>ripQ</i> , Gm <sup>r</sup>                                                                                             | This study                          |
| pACC385         | pDONR207 derivative carrying <i>ripAY</i> , Gm <sup>r</sup>                                                                                            | This study                          |
| pACC386         | pDONR207 derivative carrying <i>ripH1</i> , Gm <sup>r</sup>                                                                                            | This study                          |
| pACC426         | pDONR207 derivative carrying <i>ripR</i> , Gm <sup>r</sup>                                                                                             | This study                          |
| pACC429         | pDONR207 derivative carrying <i>ripW</i> , Gm <sup>r</sup>                                                                                             | This study                          |
| pACC532         | pENTR/D-TOPO derivative carrying <i>ripTAL</i> , Km <sup>r</sup>                                                                                       | Thomas Lahaye, Universität Tübingen |
| pACC542         | pDONR207 derivative carrying <i>ripAG</i> , Gm <sup>r</sup>                                                                                            | This study                          |
| pACC546         | pDONR207 derivative carrying <i>ripV1</i> , Gm <sup>r</sup>                                                                                            | This study                          |
| pACC588         | pDONR207 derivative carrying <i>ripH3</i> , Gm <sup>r</sup>                                                                                            | This study                          |
| pACC648         | pENTR/SD/D-TOPO derivative carrying <i>ripAD</i> , Km <sup>r</sup>                                                                                     | This study                          |
| pACC652         | pDONR207 derivative carrying <i>ripAJ</i> , Gm <sup>r</sup>                                                                                            | This study                          |
| pBR356          | Vector carrying <i>avrBs3Δ2</i> downstream of the lac promoter and the lacZ fragment flanked by <i>BsaI</i> sites                                      | 7                                   |
| pDONR207        | Gateway <sup>TM</sup> entry vector, Gm <sup>r</sup> Cm <sup>r</sup>                                                                                    | Invitrogen, Carlsbad, CA, USA       |
| pENTR/SD/D-TOPO | Gateway <sup>TM</sup> entry vector, Shine–Dalgarno sequence, Km <sup>r</sup>                                                                           | Invitrogen, Carlsbad, CA, USA       |
| pFL47           | pENTR/SD/D-TOPO derivative carrying <i>hpaB<sub>Xcv85-10</sub></i> , Km <sup>r</sup>                                                                   | This study                          |
| pFL92           | pGEM-T derivative carrying <i>ripP1</i> flanked by <i>BsaI</i> site                                                                                    | This study                          |
| pGAD            | Matchmaker <sup>TM</sup> pGADT7 yeast expression vector made Gateway <sup>TM</sup> compatible, N-terminal AD fusion, Ap <sup>r</sup> , Cm <sup>r</sup> | 8                                   |
| pGBG            | Matchmaker <sup>TM</sup> pGADT7 yeast expression vector made Gateway <sup>TM</sup> compatible, N-terminal BD fusion, Ap <sup>r</sup> , Cm <sup>r</sup> | 8                                   |
| pGEX            | Gateway <sup>TM</sup> expression vector, N-terminal GST fusion, Ap <sup>r</sup>                                                                        | Invitrogen, Carlsbad, CA, USA       |
| pGEM-T          | TA cloning vector, lacZα, f1 ori, Amp <sup>r</sup>                                                                                                     | Promega, Madison, WI, USA           |
| pLBy1           | pDONR207 derivative carrying <i>hpaD</i> , Gm <sup>r</sup>                                                                                             | This study                          |
| pLBy3           | pDONR207 derivative carrying <i>ripI</i> , Gm <sup>r</sup>                                                                                             | This study                          |

|                                      |                                                                                                                                                                      |                               |
|--------------------------------------|----------------------------------------------------------------------------------------------------------------------------------------------------------------------|-------------------------------|
| pLBy5                                | pDONR207 derivative carrying <i>hpaB</i> , Gm <sup>r</sup>                                                                                                           | 3                             |
| pLby7                                | pDONR207 derivative carrying <i>ripU</i> , Gm <sup>r</sup>                                                                                                           | This study                    |
| pLBy13                               | pDONR207 derivative carrying <i>ripAV</i> , Gm <sup>r</sup>                                                                                                          | This study                    |
| pMP12                                | pDONR207 derivative carrying <i>ripTPS</i> , Gm <sup>r</sup>                                                                                                         | 9                             |
| pMS130                               | pENTR/SD/D-TOPO derivative carrying <i>ripA2</i> , Km <sup>r</sup>                                                                                                   | 10                            |
| pMS132                               | pDONR207 derivative carrying <i>ripA5</i> , Gm <sup>r</sup>                                                                                                          | 10                            |
| pMS456                               | pDONR207 derivative carrying <i>ripA3</i> , Gm <sup>r</sup>                                                                                                          | 10                            |
| pMS457                               | pDONR207 derivative carrying <i>ripA1</i> , Gm <sup>r</sup>                                                                                                          | 10                            |
| pMS459                               | pENTR/SD/D-TOPO derivative carrying <i>ripA4</i> , Km <sup>r</sup>                                                                                                   | 10                            |
| pNP200                               | pDONR207 derivative carrying <i>ripG7</i> , Gm <sup>r</sup>                                                                                                          | 11                            |
| pNP329                               | pRCG derivative with the <i>ripG7</i> promoter followed by a Gateway <sup>TM</sup> destination cassette and a triple HA epitope tag, Gm <sup>r</sup> Km <sup>r</sup> | 8                             |
| pPR122                               | pDONR207 derivative carrying <i>ripG6</i> , Gm <sup>r</sup>                                                                                                          | 11                            |
| pPR126                               | pDONR207 derivative carrying <i>ripG4</i> , Gm <sup>r</sup>                                                                                                          | 11                            |
| pPR134                               | pDONR207 derivative carrying <i>ripG5</i> , Gm <sup>r</sup>                                                                                                          | 11                            |
| pPR156                               | pDONR207 derivative carrying <i>ripG3</i> , Gm <sup>r</sup>                                                                                                          | 11                            |
| pPR181                               | pDONR207 derivative carrying <i>ripG1</i> , Gm <sup>r</sup>                                                                                                          | 11                            |
| pSC192                               | pENTR/SD/D-TOPO derivative carrying <i>ripB</i> , Km <sup>r</sup>                                                                                                    | This study                    |
| pTH19                                | Gateway <sup>TM</sup> expression vector, N-terminal 6His tag, Ap <sup>r</sup>                                                                                        | Invitrogen, Carlsbad, CA, USA |
| <b>Plasmids for yeast two hybrid</b> |                                                                                                                                                                      |                               |
| pDL6                                 | pGBG derivative carrying <i>hpaB</i> , Km <sup>r</sup>                                                                                                               | This study                    |
| pDL7                                 | pGBG derivative carrying <i>hpaD</i> , Km <sup>r</sup>                                                                                                               | This study                    |
| pDL9                                 | pGAD derivative carrying <i>ripI</i> , Amp <sup>r</sup>                                                                                                              | This study                    |
| pDL10                                | pGAD derivative carrying <i>ripU</i> , Amp <sup>r</sup>                                                                                                              | This study                    |
| pDL12                                | pGAD derivative carrying <i>ripAV</i> , Amp <sup>r</sup>                                                                                                             | This study                    |

|       |                                                           |            |
|-------|-----------------------------------------------------------|------------|
| pDL13 | pGAD derivative carrying <i>ripAG</i> , Amp <sup>r</sup>  | This study |
| pDL14 | pGAD derivative carrying <i>ripAD</i> , Amp <sup>r</sup>  | This study |
| pDL15 | pGAD derivative carrying <i>ripAZ1</i> , Amp <sup>r</sup> | This study |
| pDL16 | pGAD derivative carrying <i>ripAJ</i> , Amp <sup>r</sup>  | This study |
| pDL17 | pGAD derivative carrying <i>ripAF1</i> , Amp <sup>r</sup> | This study |
| pDL18 | pGAD derivative carrying <i>ripO1</i> , Amp <sup>r</sup>  | This study |
| pDL19 | pGAD derivative carrying <i>ripZ</i> , Amp <sup>r</sup>   | This study |
| pDL20 | pGAD derivative carrying <i>ripAM</i> , Amp <sup>r</sup>  | This study |
| pDL21 | pGAD derivative carrying <i>ripH2</i> , Amp <sup>r</sup>  | This study |
| pDL22 | pGAD derivative carrying <i>ripAK</i> , Amp <sup>r</sup>  | This study |
| pDL23 | pGAD derivative carrying <i>ripAN</i> , Amp <sup>r</sup>  | This study |
| pDL24 | pGAD derivative carrying <i>ripAW</i> , Amp <sup>r</sup>  | This study |
| pDL25 | pGAD derivative carrying <i>ripQ</i> , Amp <sup>r</sup>   | This study |
| pDL26 | pGAD derivative carrying <i>ripV1</i> , Amp <sup>r</sup>  | This study |
| pDL27 | pGAD derivative carrying <i>ripAY</i> , Amp <sup>r</sup>  | This study |
| pDL28 | pGAD derivative carrying <i>ripH1</i> , Amp <sup>r</sup>  | This study |
| pDL29 | pGAD derivative carrying <i>ripR</i> , Amp <sup>r</sup>   | This study |
| pDL30 | pGAD derivative carrying <i>ripW</i> , Amp <sup>r</sup>   | This study |
| pDL33 | pGAD derivative carrying <i>ripA2</i> , Amp <sup>r</sup>  | This study |
| pDL34 | pGAD derivative carrying <i>ripA4</i> , Amp <sup>r</sup>  | This study |
| pDL35 | pGAD derivative carrying <i>ripA3</i> , Amp <sup>r</sup>  | This study |
| pDL36 | pGAD derivative carrying <i>ripA5</i> , Amp <sup>r</sup>  | This study |
| pDL37 | pGAD derivative carrying <i>ripA1</i> , Amp <sup>r</sup>  | This study |
| pDL38 | pGAD derivative carrying <i>ripTPS</i> , Amp <sup>r</sup> | This study |
| pDL40 | pGAD derivative carrying <i>ripG4</i> , Amp <sup>r</sup>  | This study |

|          |                                                           |                                    |
|----------|-----------------------------------------------------------|------------------------------------|
| pDL41    | pGAD derivative carrying <i>ripG5</i> , Amp <sup>r</sup>  | This study                         |
| pDL42    | pGAD derivative carrying <i>ripG6</i> , Amp <sup>r</sup>  | This study                         |
| pDL43    | pGAD derivative carrying <i>ripG7</i> , Amp <sup>r</sup>  | This study                         |
| pDL44    | pGAD derivative carrying <i>ripB</i> , Amp <sup>r</sup>   | This study                         |
| pDL45    | pGAD derivative carrying <i>ripG1</i> , Amp <sup>r</sup>  | This study                         |
| pDL46    | pGAD derivative carrying <i>ripG3</i> , Amp <sup>r</sup>  | This study                         |
| pDL47    | pGAD derivative carrying <i>ripH3</i> , Amp <sup>r</sup>  | This study                         |
| pDL48    | pGAD derivative carrying <i>ripTAL</i> , Amp <sup>r</sup> | This study                         |
| pDL50    | pGAD derivative carrying <i>hpaB</i> , Amp <sup>r</sup>   | This study                         |
| pDL51    | pGAD derivative carrying <i>hpaD</i> , Amp <sup>r</sup>   | This study                         |
| pDL53    | pGAD derivative carrying <i>ripP1</i> , Amp <sup>r</sup>  | This study                         |
| pDL54    | pGAD derivative carrying <i>ripP2</i> , Amp <sup>r</sup>  | This study                         |
| pAD-T-Ag | AD-t-antigen fusion                                       | BD Biosciences, Palo Alto, CA, USA |
| pBD-p53  | BD-p53 fusion, Km <sup>r</sup>                            | BD Biosciences, Palo Alto, CA, USA |

#### Plasmids for GST-Pulldown

|        |                                                           |            |
|--------|-----------------------------------------------------------|------------|
| pDL175 | pGEX derivative carrying <i>hpaD</i> , Amp <sup>r</sup>   | This study |
| pDL188 | pGEX derivative carrying KQGS*, Apr                       | 8          |
| pDL193 | pTH19 derivative carrying <i>hpaD</i> , Amp <sup>r</sup>  | This study |
| pFL37  | pTH19 derivative carrying <i>hpaB</i> , Amp <sup>r</sup>  | This study |
| pFL67  | pGEX derivative carrying <i>ripAF1</i> , Amp <sup>r</sup> | This study |
| pFL68  | pGEX derivative carrying <i>ripAK</i> , Amp <sup>r</sup>  | This study |
| pFL69  | pGEX derivative carrying <i>ripG5</i> , Amp <sup>r</sup>  | This study |
| pFL70  | pGEX derivative carrying <i>ripG1</i> , Amp <sup>r</sup>  | This study |
| pFL71  | pGEX derivative carrying <i>ripG7</i> , Amp <sup>r</sup>  | This study |
| pFL72  | pGEX derivative carrying <i>ripTPS</i> , Amp <sup>r</sup> | This study |

|                                                                            |                                                                                                |                         |
|----------------------------------------------------------------------------|------------------------------------------------------------------------------------------------|-------------------------|
| pFL75                                                                      | pGEX derivative carrying <i>ripAW</i> , Amp <sup>r</sup>                                       | This study              |
| pFL76                                                                      | pGEX derivative carrying <i>ripO1</i> , Amp <sup>r</sup>                                       | This study              |
| pFL77                                                                      | pGEX derivative carrying <i>ripW</i> , Amp <sup>r</sup>                                        | This study              |
| pFL83                                                                      | pGEX derivative carrying <i>ripP1</i> , Amp <sup>r</sup>                                       | This study              |
| pFL84                                                                      | pGEX derivative carrying <i>hpaB</i> , Amp <sup>r</sup>                                        | This study              |
| pFL116                                                                     | pTH19 derivative carrying <i>hpaB<sub>Xcv</sub></i> , Amp <sup>r</sup>                         | This study              |
| pGEX-RipP1                                                                 | pGEX derivative carrying <i>ripP1</i> , Amp <sup>r</sup>                                       | Laurent Deslandes, LIPM |
| pGEX-RipP2                                                                 | pGEX derivative carrying <i>ripP2</i> , Amp <sup>r</sup>                                       | 12                      |
| <b>Plasmids transformed in <i>R. solanacearum</i></b>                      |                                                                                                |                         |
| pAM5                                                                       | pLAFR3 carrying 2-kb fragment containing <i>hrpB</i> , Tc <sup>r</sup>                         | 13                      |
| pEG11                                                                      | pNP329 derivative carrying <i>hpaB<sub>GMI1000</sub></i> , Km <sup>r</sup> , Gm <sup>r</sup>   | 3                       |
| pFL49                                                                      | pNP329 derivative carrying <i>hpaB<sub>Xcv 85-10</sub></i> , Km <sup>r</sup> , Gm <sup>r</sup> | This study              |
| <b>Plasmids transformed in <i>X. campestris</i> pv. <i>vesicatoria</i></b> |                                                                                                |                         |
| pFL98                                                                      | pBR356 derivative carrying <i>ripP1</i> , Gm <sup>r</sup>                                      | This study              |



**Supplementary Table S3: List of primers used in this study.**

|        | <b>Gene</b>    | <b>Recipient Plasmid</b> | <b>Plasmid ID</b> | <b>Primers</b>   | <b>Primer Sequences</b>                                                   |
|--------|----------------|--------------------------|-------------------|------------------|---------------------------------------------------------------------------|
| RipAZ1 | <i>RSp1582</i> | pDONR207                 | pACC61            | Oacc31<br>Oacc32 | GGAGATAGAACCATGCCCCATCGATCCG<br>CAAGAAAGCTGGGTCTCMCACCGGGAATGCTTTCC       |
| RipAF1 | <i>RSp0822</i> | pDONR207                 | pACC73            | Oacc19<br>Oacc20 | GGAGATAGAACCATGGGTTTGCCACGGATC<br>CAAGAAAGCTGGGTCTCMTCGCGTTGACGTGGACG     |
| RipO1  | <i>RSp0323</i> | pDONR207                 | pACC75            | Oacc17<br>Oacc18 | GGAGATAGAACCATGCCAAAAATCCAAAAAACCC<br>CAAGAAAGCTGGGTCTCMGGCGGCGGGGCTGGCC  |
| RipZ   | <i>RSp1031</i> | pDONR207                 | pACC82            | Oacc23<br>Oacc24 | GGAGATAGAACCATGCCGCGTTTTTCAAACCTG<br>CAAGAAAGCTGGGTCTCMTCGGCGCATCGACGGCG  |
| RipAM  | <i>RSc3272</i> | pDONR207                 | pACC93            | Oacc11<br>Oacc12 | GGAGATAGAACCATGAAACGAATCGACGTCCAC<br>CAAGAAAGCTGGGTCTCMGGCCGGCCGCGTCGTTG  |
| RipH2  | <i>RSp0215</i> | pDONR207                 | pACC98            | Oacc13<br>Oacc14 | GGAGATAGAACCATGCTTGCGGAAACATCACGGA<br>CAAGAAAGCTGGGTCTCMATGCGCCCCCGGCGCGC |
| RipAK  | <i>RSc2359</i> | pDONR207                 | pACC113           | Oacc9<br>Oacc10  | GGAGATAGAACCATGCGCCCTACCGCCCC<br>CAAGAAAGCTGGGTCTCMCAGGTGCGCGATGGCTC      |
| RipAN  | <i>RSp0845</i> | pDONR207                 | pACC221           | Oacc21<br>Oacc22 | GGAGATAGAACCATGCGCCCCCTCTCTTTTC<br>CAAGAAAGCTGGGTCTCMGGCTTCCGGGGCGCCG     |
| RipAW  | <i>RSp1475</i> | pDONR207                 | pACC271           | Oacc29<br>Oacc30 | GGAGATAGAACCATGGTTTTCTTGTCGGGAGC<br>CAAGAAAGCTGGGTCTCMTCGCCGCGCGGGCGAC    |
| RipQ   | <i>RSp1277</i> | pDONR207                 | pACC276           | Olb69<br>Olb70   | GGAGATAGAACCATGCTGCGAACCTCCCTTGAC<br>CAAGAAAGCTGGGTCTCMCACCATGTTCGATGGCCG |
| RipAY  | <i>RSp1022</i> | pDONR207                 | pACC385           | Olb79<br>Olb80   | GGAGATAGAACCATGGAAAGAATCTCGACAA<br>CAAGAAAGCTGGGTCTCMGTCGGGTTTGGGC        |
| RipH1  | <i>RSc1386</i> | pDONR207                 | pACC386           | Oacc3<br>Oacc4   | GGAGATAGAACCATGGCAGGAGGACGAGTCG<br>CAAGAAAGCTGGGTCTCMTCGCCGGGCGCACGC      |
| RipR   | <i>RSp1281</i> | pDONR207                 | pACC426           | Oacc57<br>Oacc58 | GGAGATAGAACCATGAACATAAGAAAATACTTAC<br>CAAGAAAGCTGGGTCTCMTTCCAGCGACTTGCTAC |

|                                       |                |                 |         |                      |                                                                               |
|---------------------------------------|----------------|-----------------|---------|----------------------|-------------------------------------------------------------------------------|
| RipW                                  | <i>RSc2775</i> | pDONR207        | pACC429 | Oacc61<br>Oacc62     | GGAGATAGAACCATGTCCATCCAGATTGATCGC<br>CAAGAAAGCTGGGTCTCMGCCCGAGTAGGCCTTGTAG    |
| RipTAL                                | <i>Rsc1815</i> | pENTR/D-TOPO    | pACC532 | Oacc177<br>Oacc178   | CACCATGAGAATAGGCAAATCAAGCGGTTGGTTGAAC<br>TCACGTTTCCAATATTTGCAGAAGCCAGTCG      |
| RipAG                                 | <i>RSc0824</i> | pDONR207        | pACC542 | Oacc1<br>Oacc2       | GGAGATAGAACCATGGGATGCGTTAATGTC<br>CAAGAAAGCTGGGTCTCMGTCAGAACGGCCGATC          |
| RipV1                                 | <i>RSc1349</i> | pDONR207        | pACC546 | Opr53<br>Opr52       | GGAGATAGAACCATGCCAACCCGCGTTCCGTCCCC<br>CAAGAAAGCTGGGTCTCMGCGGCTGCCTTGC GAA    |
| RipH3                                 | <i>Rsp0160</i> | pDONR207        | pACC588 | Olb53<br>Olb54       | GGAGATAGAACCATGTTGAAAGGACGTATCGACG<br>CAAGAAAGCTGGGTCTCMCCC GGAAGCCGGCAGCTTGA |
| RipAJ                                 | <i>RSc2101</i> | pDONR207        | pACC652 | Oacc5<br>Oacc6       | GGAGATAGAACCATGCGCCGGACGGCGACTTC<br>CAAGAAAGCTGGGTCTCMCGCTGCGCGGGGCTCGC       |
| RipAD                                 | <i>Rsp1601</i> | pENTR/SD/D-TOPO | pACC648 | Oacc217<br>Oacc34    | GGAGATAGAACCATGTTGAAAATAGGCCGTATC<br>CAAGAAAGCTGGGTCTCMCCAGTCGAGCTGCGGATC     |
| HpaB <sub>Xcv 85-10</sub>             | <i>XCV0416</i> | pENTR/SD/D-TOPO | pFL47   | Ofl82<br>Ofl83       | CACCATGAGCAGCGCGGATTC<br>TCAGGCGCGTAACCACAG                                   |
| HpaD                                  | <i>Rsp0848</i> | pDONR207        | pLBy1   | Olb17<br>Olb18       | GGAGATAGAACCATGCCCTCCGCCGAAACCG<br>CAAGAAAGCTGGGTCTCMATGCGCCTCCCACT           |
| RipI                                  | <i>RSc0041</i> | pDONR207        | pLBy3   | Olb9<br>Olb10        | GGAGATAGAACCATGCCTCTTACCAAGATCAATCCTTCGG<br>CAAGAAAGCTGGGTCTCMCTCGGTTCGTCCG   |
| RipU                                  | <i>RSp1212</i> | pDONR207        | pLby7   | Olb83<br>Olb84       | GGAGATAGAACCATGTCACGCATCTTCAGGTC<br>CAAGAAAGCTGGGTCTCMGCGCGCCTTCGTGCG         |
| RipAV                                 | <i>RSp0732</i> | pDONR207        | pLBy13  | Olb77<br>Olb78       | GGAGATAGAACCATGATCCCGAAAACACTC<br>CAAGAAAGCTGGGTCTCMCCCCACCGCCTC              |
| RipB                                  | <i>Rsc0245</i> | pENTR/SD/D-TOPO | pSC192  | RipB-Fwd<br>RipB-Rev | CACCATGAAGGCCGTCACCCGA<br>TCAGCGCGTACCCGGCGT                                  |
| <i>RipP1</i> flanked<br>by BsaI sites | <i>Rsc0826</i> | pGEM-T          | pFL92   | Ofl162<br>Ofl163     | TTTGGTCTCTTATGAAAAGACTATTCAGAGCATTGG<br>TTTGGTCTCTGATCCGACTCCAGGGCATGTCGA     |

**a**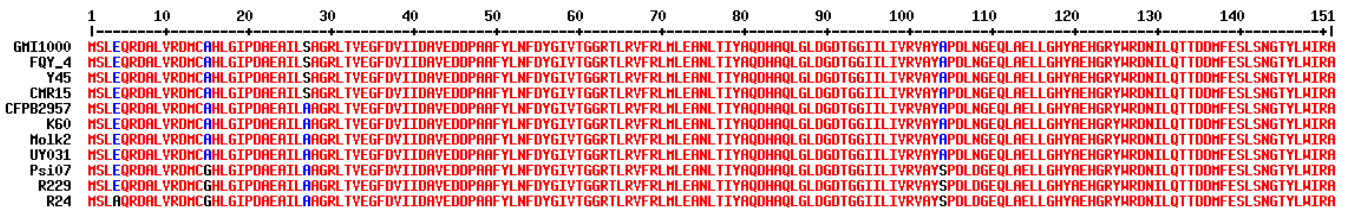**b**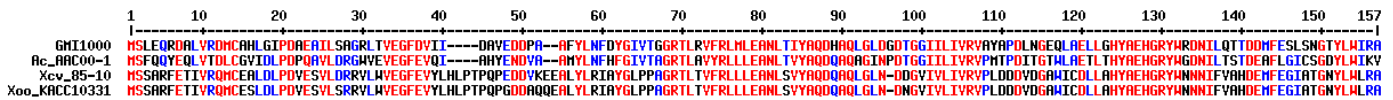

**Supplementary Figure S1.** (a) Amino acid sequence alignment of HpaB from *R. solanacearum* GMI1000 and its homologs in 10 other wild-type sequenced strains belonging to all four phylotypes. Sequences were aligned using multalin 5.4.1 (<http://multalin.toulouse.inra.fr/multalin/>). Conserved residues are colored in red. (b) Amino acid sequence alignment of HpaB from *R. solanacearum* GMI1000 and its homologs in *Acidovorax citruli* AAC00-1, *Xanthomonas campestris* pv. *vesicatoria* 85-10 and *Xanthomonas oryzae* pv. *oryzae* KACC10331. Sequences were aligned using multalin 5.4.1 (<http://multalin.toulouse.inra.fr/multalin/>). Conserved residues are colored in red.

**a**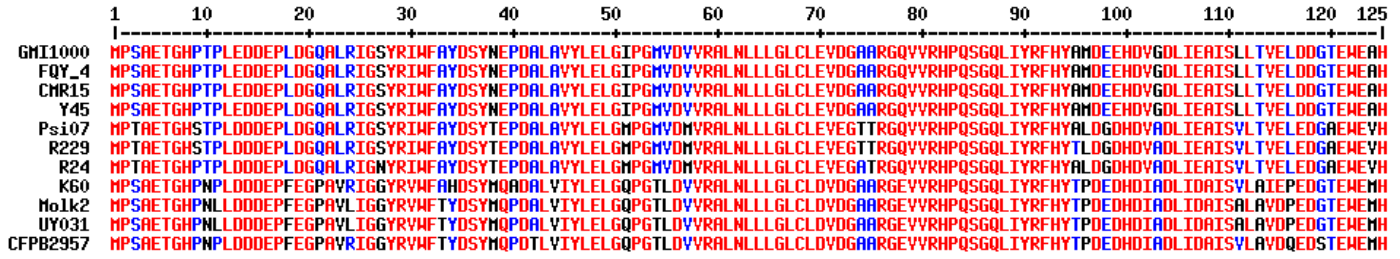**b**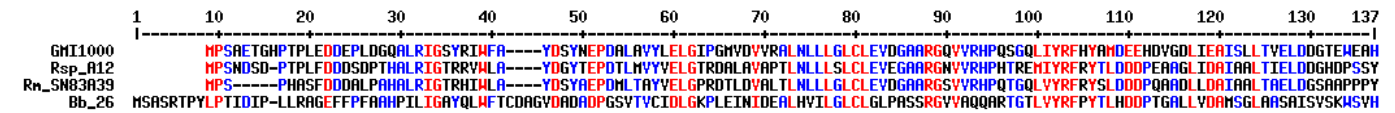

**Supplementary Figure S2.** (a) Amino acid sequence alignment of HpaD from *R. solanacearum* GMI1000 and its homologs in 10 other wild-type sequenced strains belonging to all four phylotypes. Sequences were aligned using multalin 5.4.1 (<http://multalin.toulouse.inra.fr/multalin/>). Conserved residues are colored in red. (b) Amino acid sequence alignment of HpaD from *R. solanacearum* GMI1000 and its homologs in *Ralstonia sp* A12, *Ralstonia mannitolilytica* SN83A39 and *Burkholderiaceae bacterium* 26. Sequences were aligned using multalin 5.4.1 (<http://multalin.toulouse.inra.fr/multalin/>). Conserved residues are colored in red.

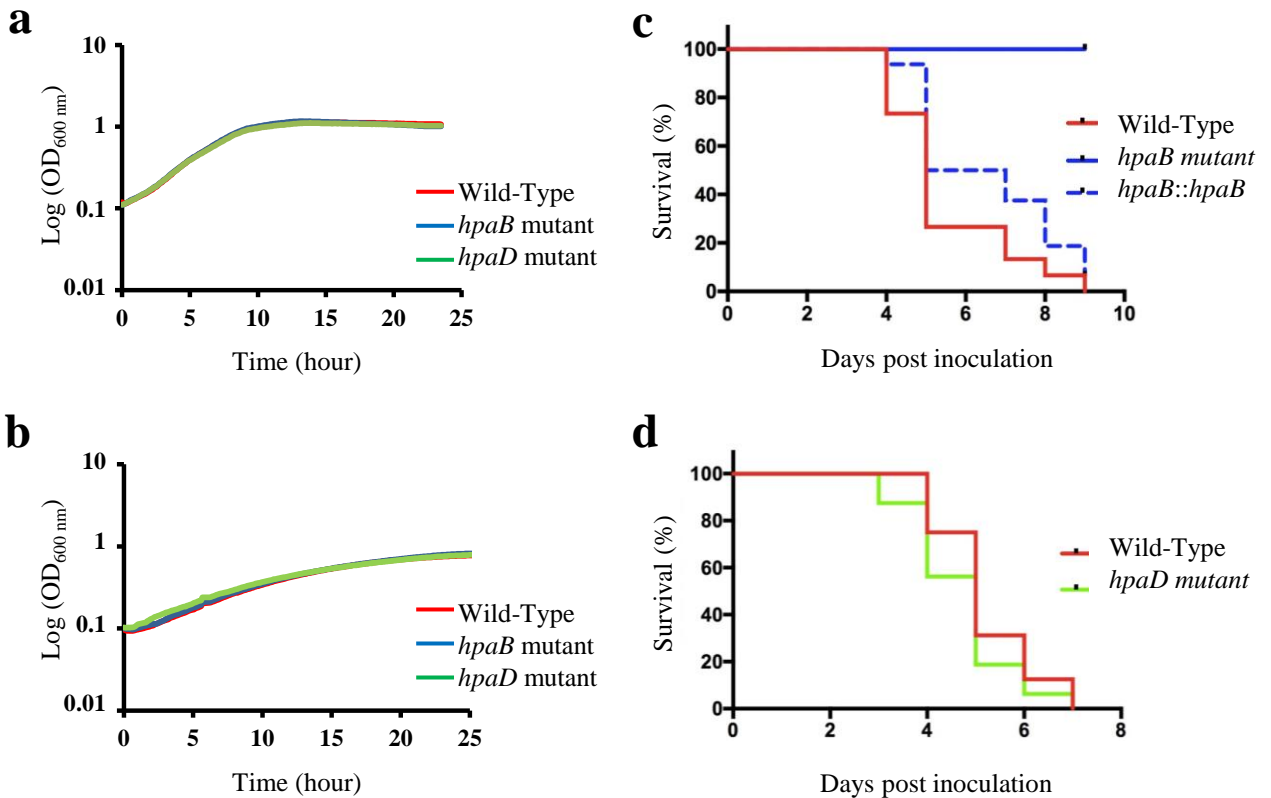

**Supplementary Figure S3.** HpaB is strictly required for *R. solanacearum* pathogenicity on tomato, not HpaD. *In vitro* growth in complete (a) or minimal medium (b), of the wild-type strain (red), and of the *hpaB* (blue) and *hpaD* (green) mutants. *In vitro* growth was investigated by monitoring OD<sub>600</sub> during 25 hours starting at 0.1 as described in material and methods. These experiments have been repeated twice. (c) Kaplan-Meier survival analysis of 16 tomato inoculated plants. Gehan-Breslow-Wilcoxon test indicates that the wild-type strain curve (red) is significantly different from the *hpaB* mutant curve (blue) (p value < 0.001), contrary to the complemented *hpaB* curve (dotted blue) (p value = 0.0678). (d) Kaplan-Meier survival analysis of 16 tomato inoculated plants. Gehan-Breslow-Wilcoxon test indicates that the wild-type strain curve (red) is not significantly different from the *hpaD* curve (green) (p value = 0.2689). These experiments have been repeated three times.

## Supplementary references

1. Salanoubat, M. *et al.* Genome sequence of the plant pathogen *Ralstonia solanacearum*. *Nature* **415**, 497–502 (2002).
2. Cunnac, S., Occhialini, A., Barberis, P., Boucher, C. & Genin, S. Inventory and functional analysis of the large Hrp regulon in *Ralstonia solanacearum*: identification of novel effector proteins translocated to plant host cells through the type III secretion system. *Mol. Microbiol.* **53**, 115–128 (2004).
3. Lonjon, F. *et al.* comparative secretome analysis of *Ralstonia solanacearum* type 3 secretion-associated mutants reveals a fine control of effector delivery, essential for bacterial pathogenicity. *Mol. Cell. Proteomics* **15**, 598–613 (2016).
4. Kousik, C. S. & Ritchie, D. F. Response of Bell Pepper Cultivars to Bacterial Spot Pathogen Races that Individually Overcome Major Resistance Genes. *Plant Dis.* **82**, 181–186 (1998).
5. Wengelnik, K., Rossier, O. & Bonas, U. Mutations in the regulatory gene *hrpG* of *Xanthomonas campestris* pv. *vesicatoria* result in constitutive expression of all *hrp* genes. *J. Bacteriol.* **181**, 6828–6831 (1999).
6. Büttner, D., Gürlebeck, D., Noël, L. D. & Bonas, U. HpaB from *Xanthomonas campestris* pv. *vesicatoria* acts as an exit control protein in type III-dependent protein secretion. *Mol. Microbiol.* **54**, 755–768 (2004).
7. Scheibner, F., Schulz, S., Hausner, J., Marillonnet, S. & Büttner, D. Type III-Dependent Translocation of HrpB2 by a Nonpathogenic *hpaABC* Mutant of the Plant-Pathogenic Bacterium *Xanthomonas campestris* pv. *vesicatoria*. *Appl. Environ. Microbiol.* **82**, 3331–3347 (2016).

8. Lohou, D. *et al.* HpaP modulates type III effector secretion in *Ralstonia solanacearum* and harbours a substrate specificity switch domain essential for virulence. *Mol. Plant Pathol.* **15**:601-614 (2014).
9. Poueymiro, M. *et al.* Two type III secretion system effectors from *Ralstonia solanacearum* GMI1000 determine host-range specificity on tobacco. *Mol. Plant-Microbe Interact.* **22**, 538–550 (2009).
10. Solé, M. *et al.* The awr gene family encodes a novel class of *Ralstonia solanacearum* type III effectors displaying virulence and avirulence activities. *Mol. Plant-Microbe Interact.* **25**, 941–953 (2012).
11. Remigi, P., Anisimova, M., Guidot, A., Genin, S. & Peeters, N. Functional diversification of the GALA type III effector family contributes to *Ralstonia solanacearum* adaptation on different plant hosts. *New Phytol.* **192**, 976–987 (2011).
12. Tasset, C. *et al.* Autoacetylation of the *Ralstonia solanacearum* effector PopP2 targets a lysine residue essential for RRS1-R-mediated immunity in Arabidopsis. *PLoS Pathog.* **6**, e1001202 (2010).
13. Guéron, M., Timmers, A. C., Boucher, C. & Arlat, M. Two novel proteins, PopB, which has functional nuclear localization signals, and PopC, which has a large leucine-rich repeat domain, are secreted through the *hrp*-secretion apparatus of *Ralstonia solanacearum*. *Mol. Microbiol.* **36**, 261–277 (2000).
